# Supplementary material for: Isolation of 1-(3′,4′-Dihydroxyphenyl)-3-(2″,4″,6″-trihydroxyphenyl)-propan-2-ol from Grape Seed Extract and Evaluation of its Antioxidant and Antispasmodic Potential
Source: MDPI journal article supplement (doi:10.3390/molecules24132466), 2019-07-04

# Isolation of 1-(3',4'-dihydroxyphenyl)-3-(2'',4'',6''-trihydroxyphenyl)-propan-2-ol from Grape Seed Extract and evaluation of its antioxidant and antispasmodic potential.

Michał Gleńsk<sup>1,\*</sup>, William J. Hurst<sup>2</sup>, Vitold B. Glinski<sup>3</sup>, Marek Bednarski<sup>4</sup>, Jan A. Gliński<sup>3</sup>

<sup>1</sup> Department of Pharmacognosy, Wrocław Medical University, Borowska 211a, 50-556 Wrocław, Poland

<sup>2</sup> Gretna Scientific LLC, 400 7th St., Mount Gretna, PA 17064, USA

<sup>3</sup> Planta Analytica, LLC, 461 Danbury Rd, New Milford, CT 06776, USA

<sup>4</sup> Department of Pharmacological Screening, Chair of Pharmacodynamics, Jagiellonian University Medical College, Medyczna 9, 30-688 Kraków, Poland

\* Correspondence: [michal.glensk@umed.wroc.pl](mailto:michal.glensk@umed.wroc.pl); Tel.: +48-71-78-40-223

**Figure S1:** <sup>1</sup>H NMR spectrum of compound **1**

**Figure S2:** <sup>13</sup>C NMR spectrum of compound **1**

**Figure S1:**  $^1\text{H}$  NMR spectrum of compound **1**

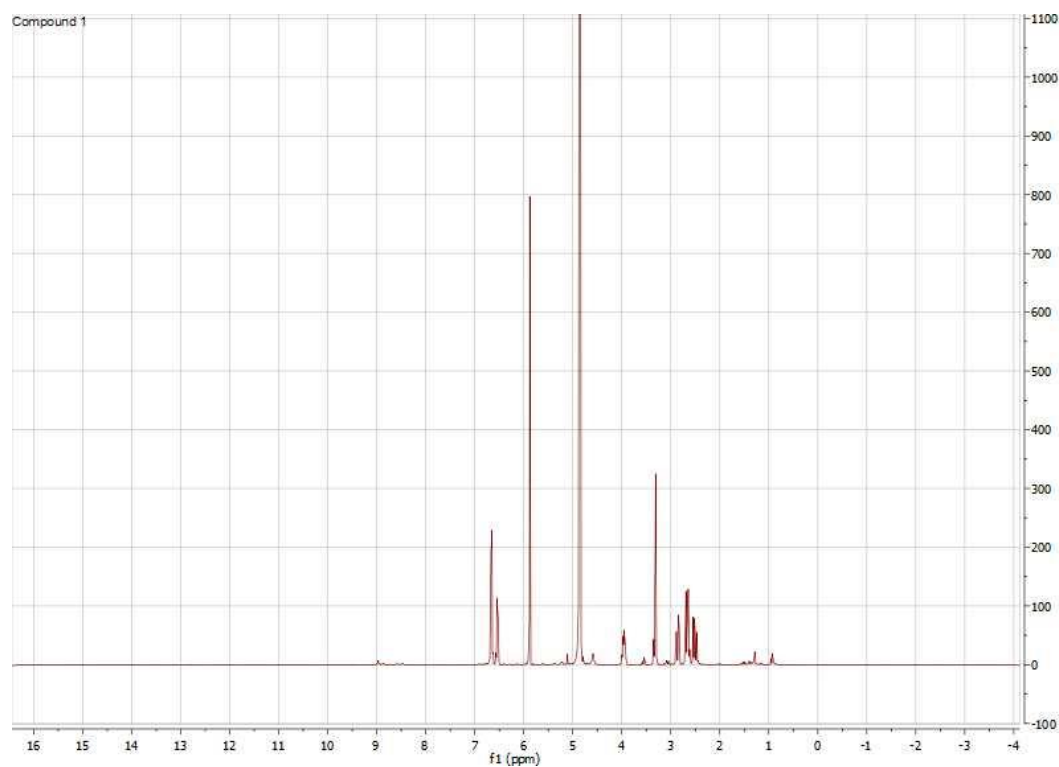

**Figure S2:**  $^{13}\text{C}$  NMR spectrum of compound **1**

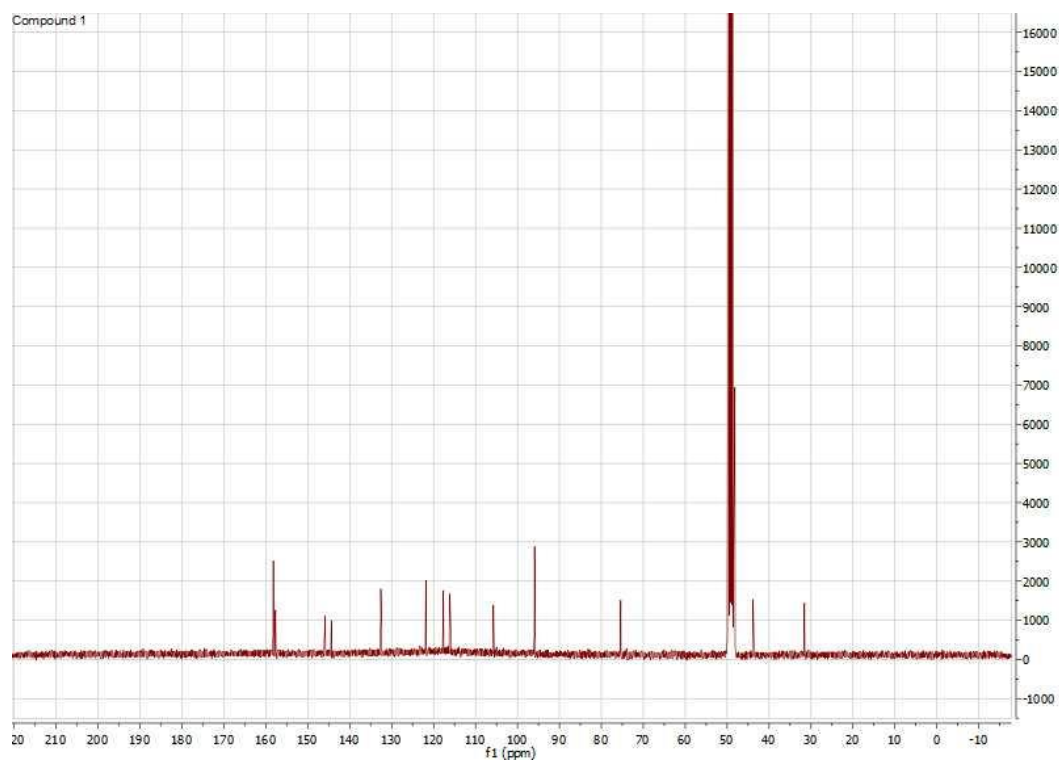

Supplement: s1 [file s1]
